# Supplementary material for: Prediction of Indoor Air Exposure from Outdoor Air Quality Using an Artificial Neural Network Model for Inner City Commercial Buildings
Source: PubMed Central journal article supplement (PMC4690911; doi:10.3390/ijerph121214975), 2015-12-01
Supplement: ijerph-12-14975-s001.pdf [file ijerph-12-14975-s001.pdf]

# Prediction of indoor air exposure from outdoor air quality using an artificial neural network model for inner city commercial buildings

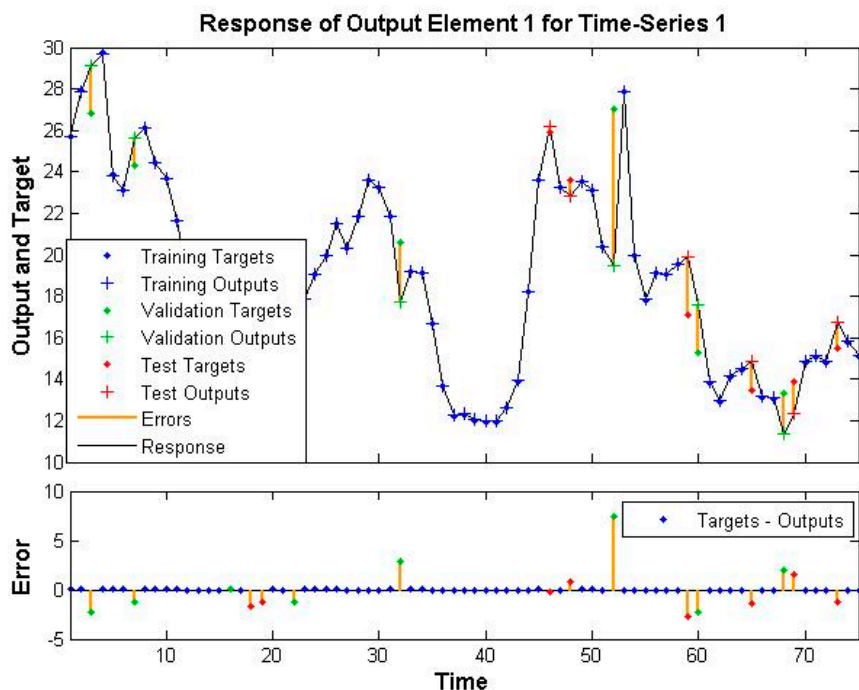

Figure S1. Time series of neural network training Mc2 run 2 NO<sub>2</sub>.

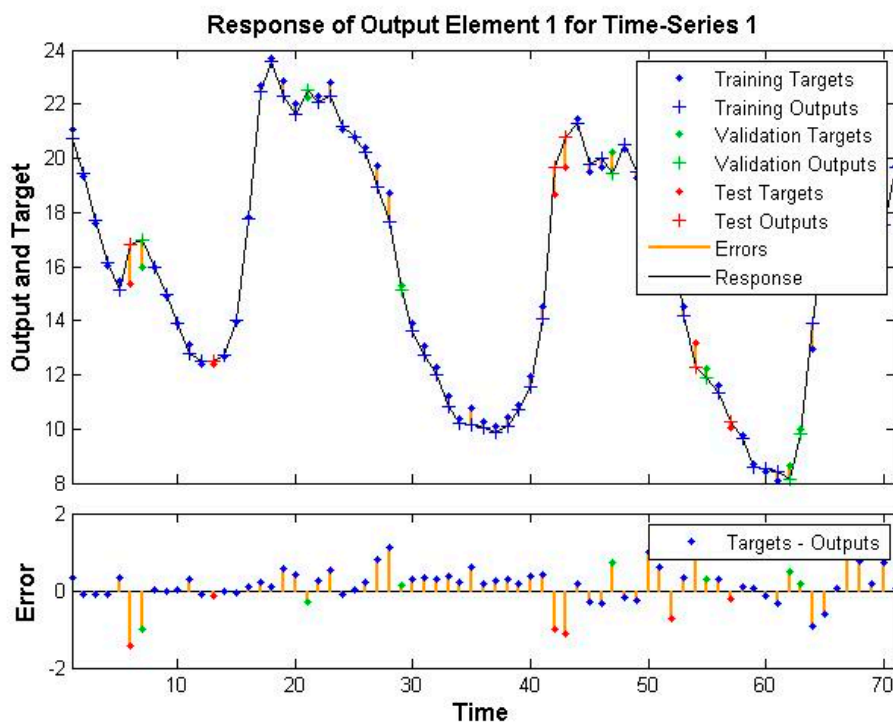

Figure S2. Time series of neural network training Mc3 run 1 NO<sub>2</sub>.

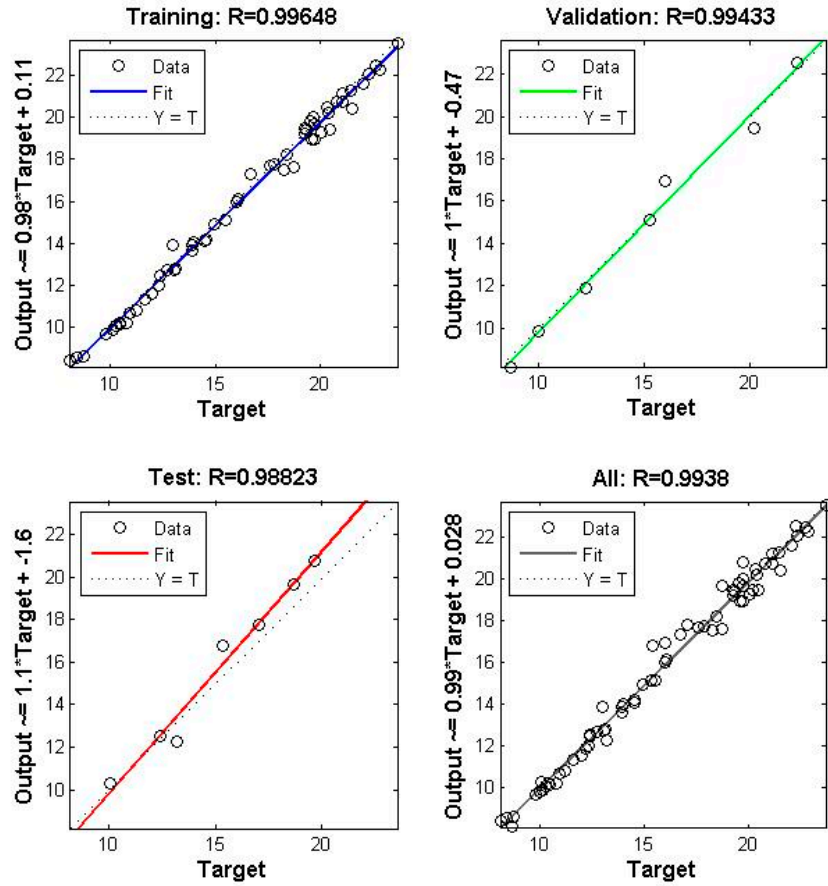

Figure S3. Mc3 run 1 NO<sub>2</sub> regression of trained output data set.

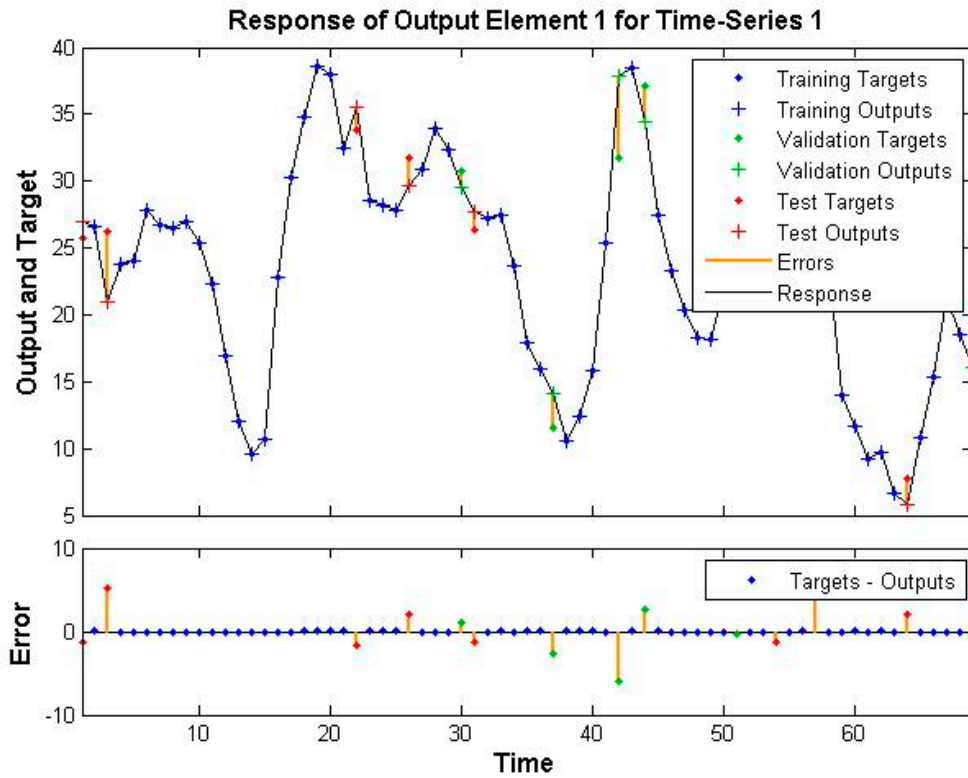

Figure S4. Time series of neural network training Mc3 run 2 NO<sub>2</sub>.

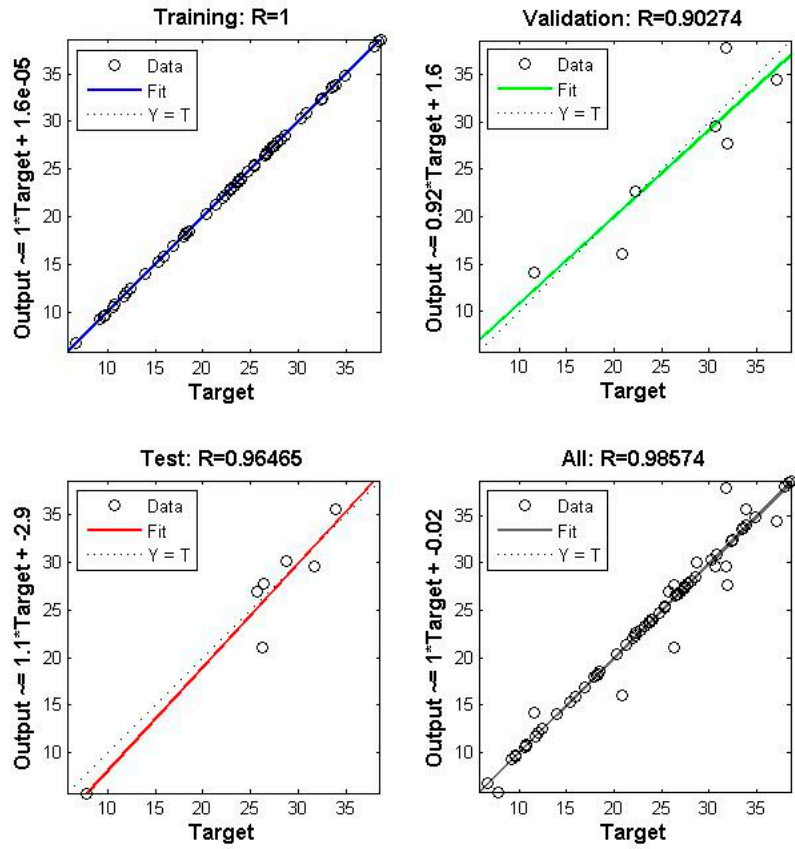

Figure S5. M<sub>c</sub>3 run 2 NO<sub>2</sub> regression of trained output data set.

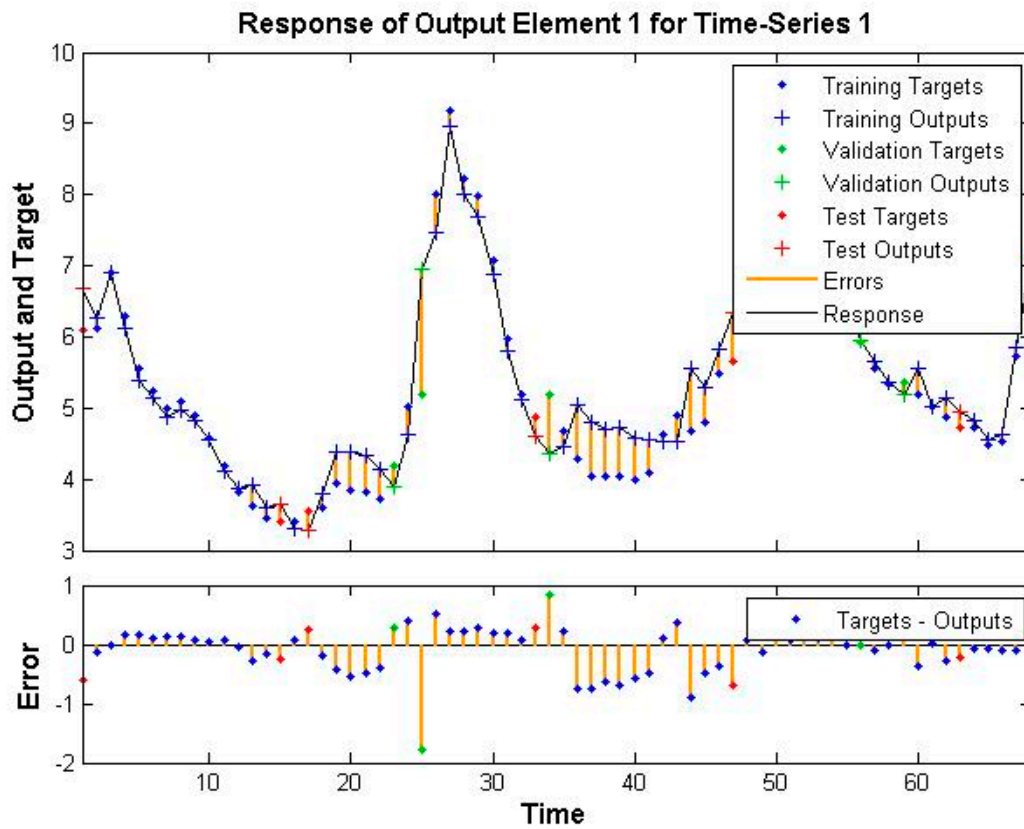

Figure S6. Time series of neural network training N<sub>t</sub>2 run 1 NO<sub>2</sub>.

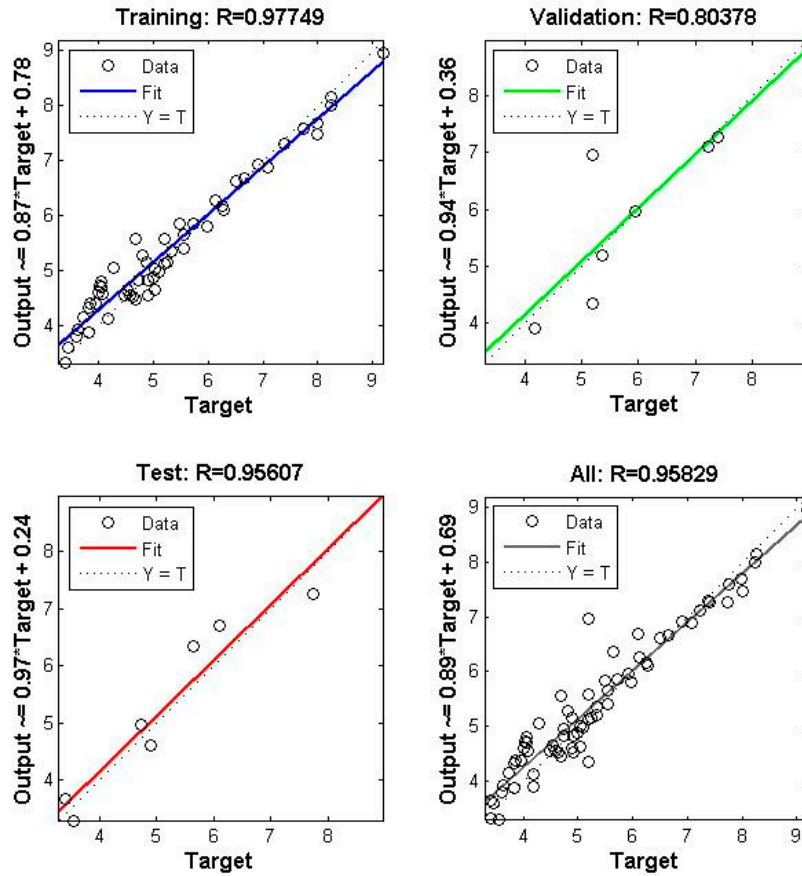

Figure S7.  $\text{Nt}_2$  run 1  $\text{NO}_2$  regression of trained output data set.

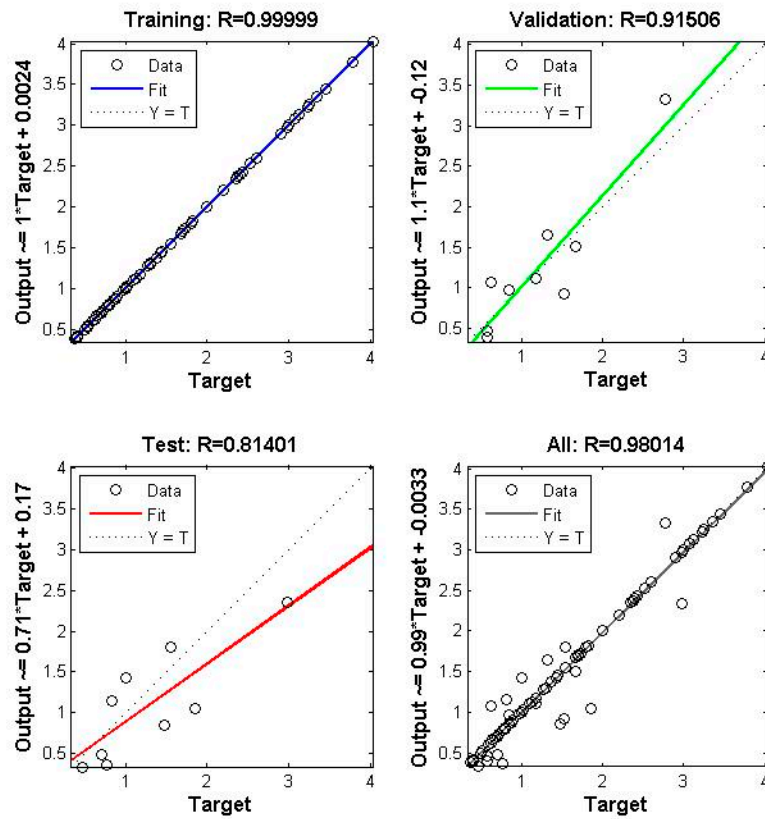

Figure S8.  $\text{Nt}_2$  run 2  $\text{NO}_2$  regression of trained output data set.

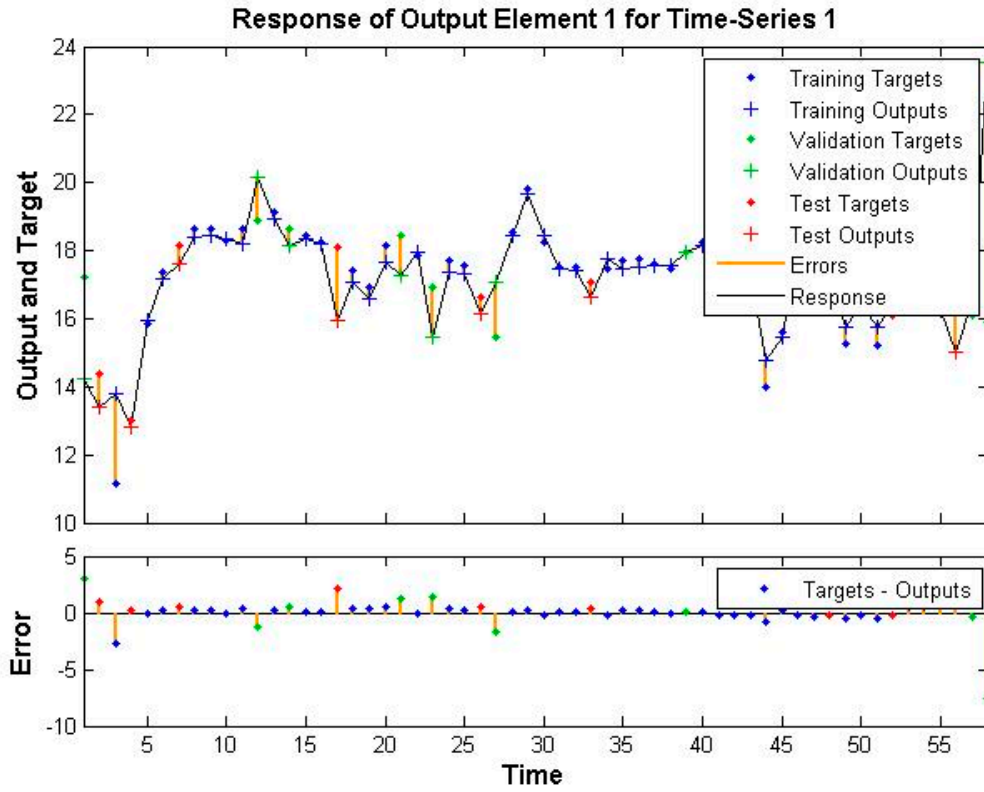

Figure S9. Time series of neural network training Mc3 run 1 PM<sub>2.5</sub>.

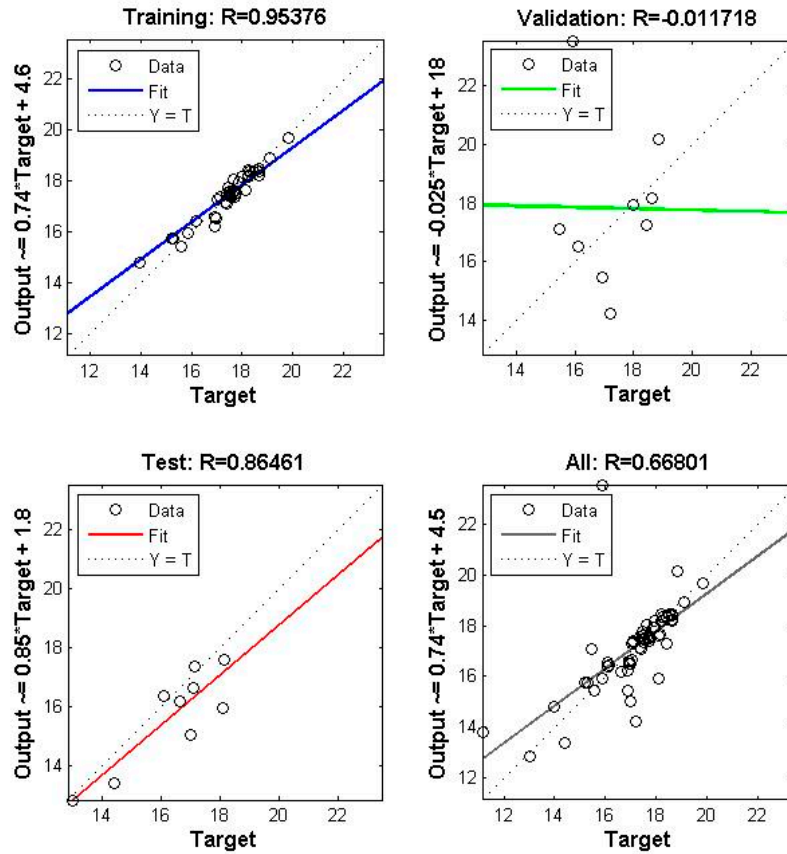

Figure S10. Mc3 run 1 PM<sub>2.5</sub> regression of trained output data set.

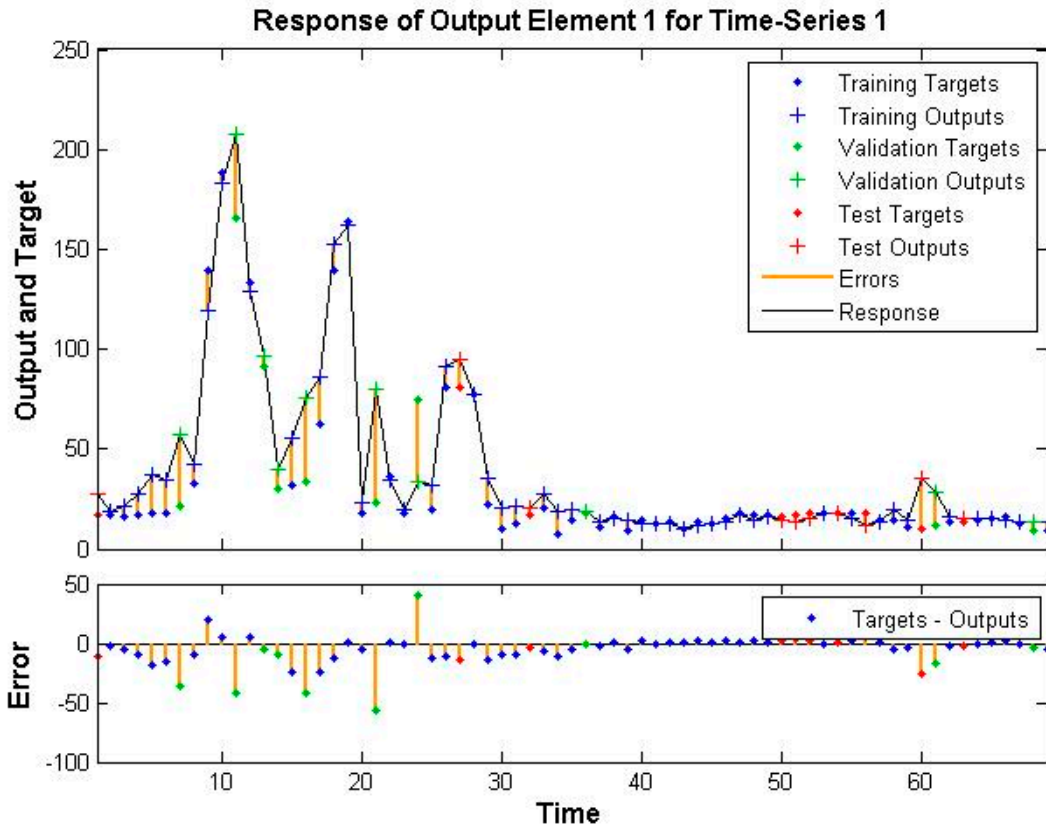

**Figure S11.** Time series of neural network training M<sub>c</sub>3 run 2 (Street) PM<sub>2.5</sub>.

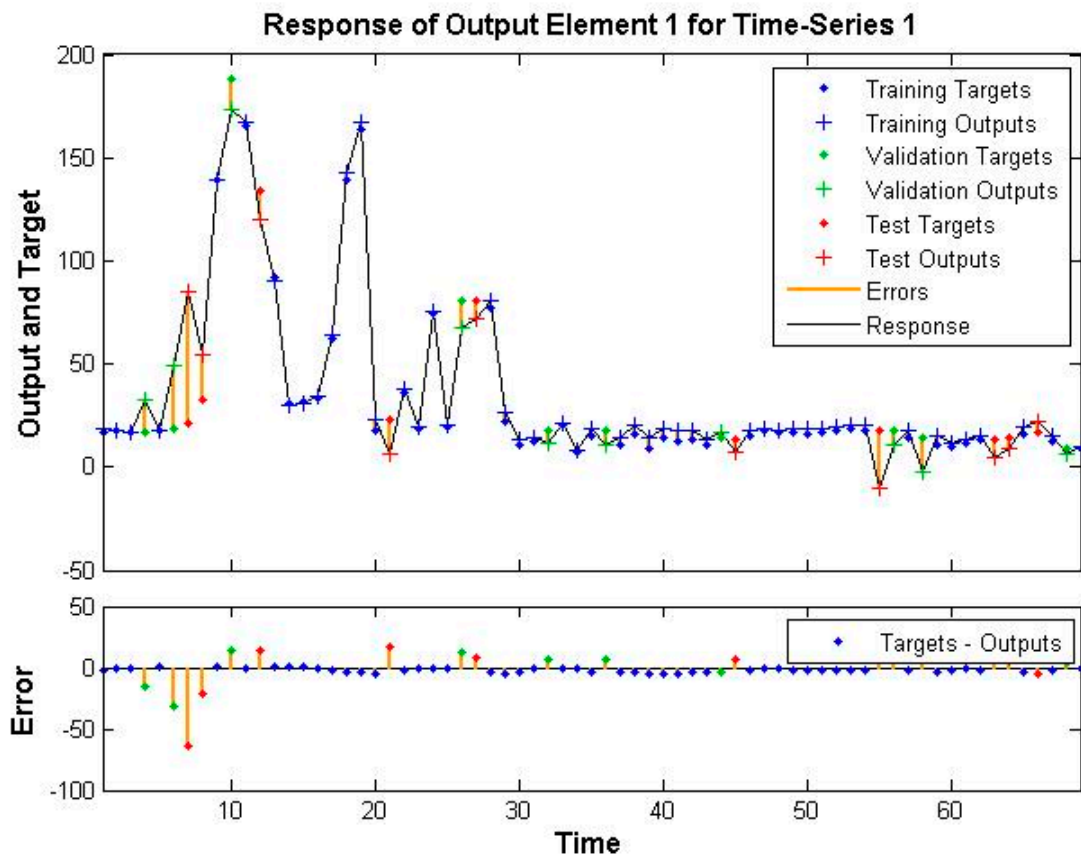

**Figure S12.** Time series of neural network training M<sub>c</sub>3 run 2 (roof) PM<sub>2.5</sub>.

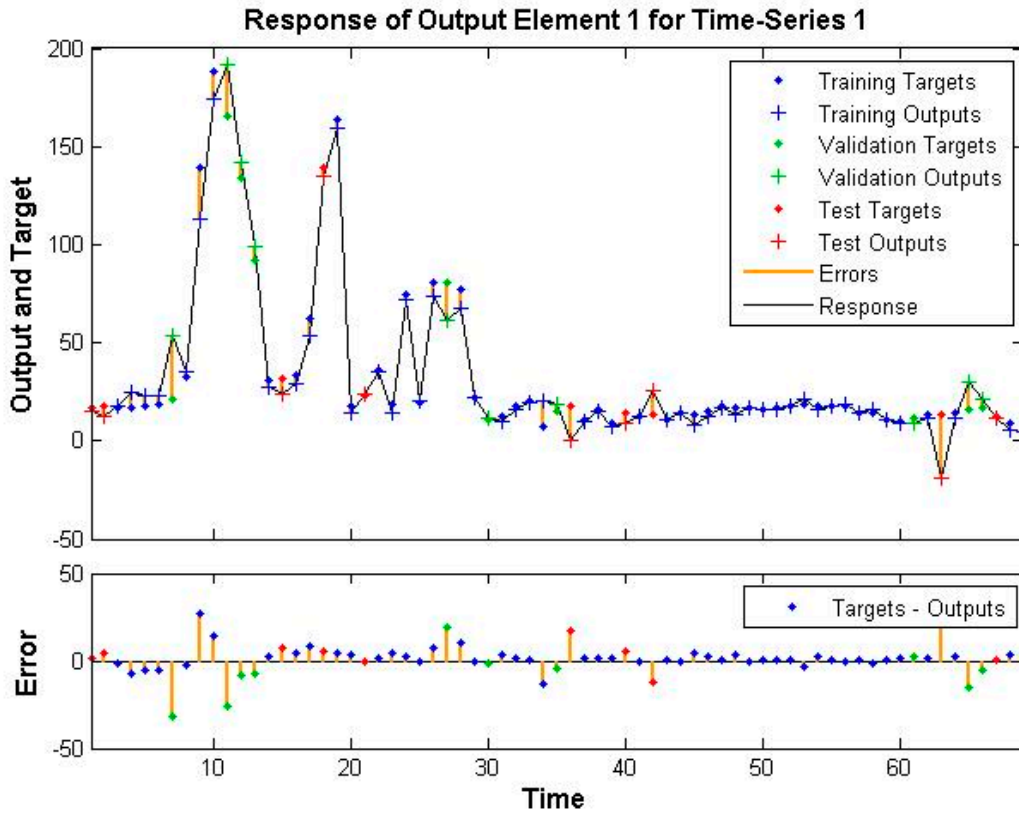

Figure S13. Time series of neural network training Mc3 run 2 PM<sub>2.5</sub>.

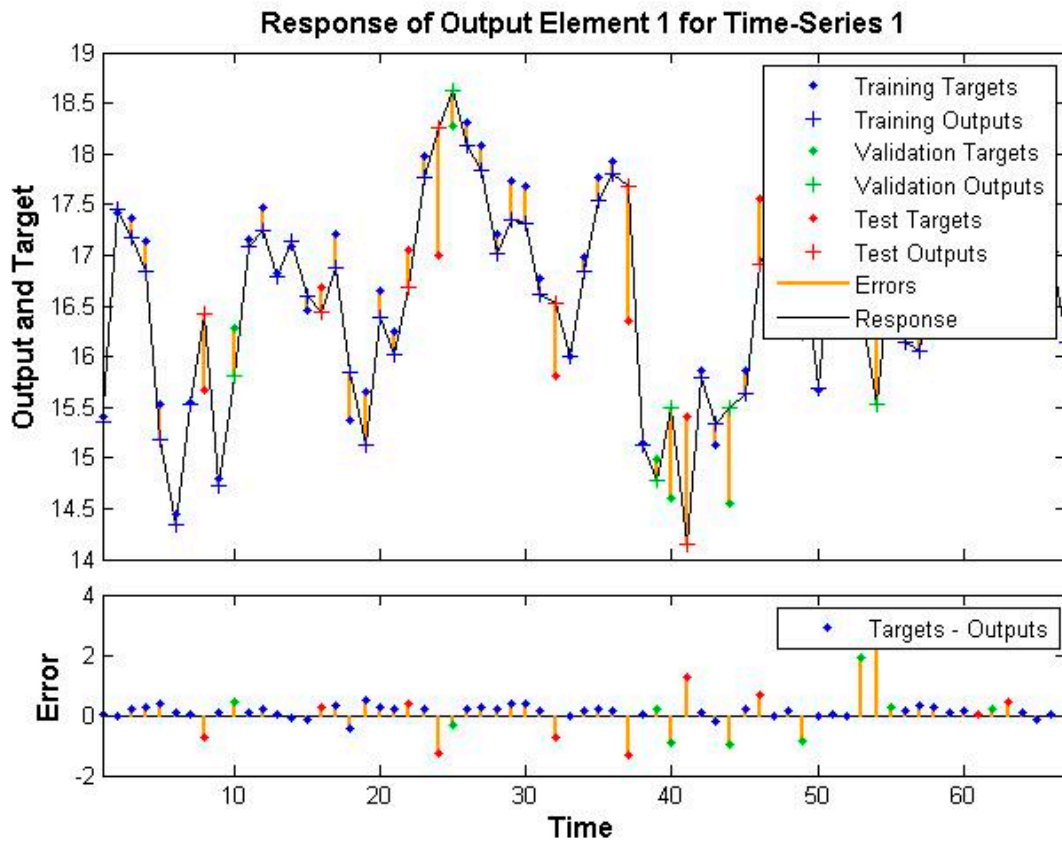

Figure S14. Time series of neural network training Nt2 run 1 PM<sub>2.5</sub>.

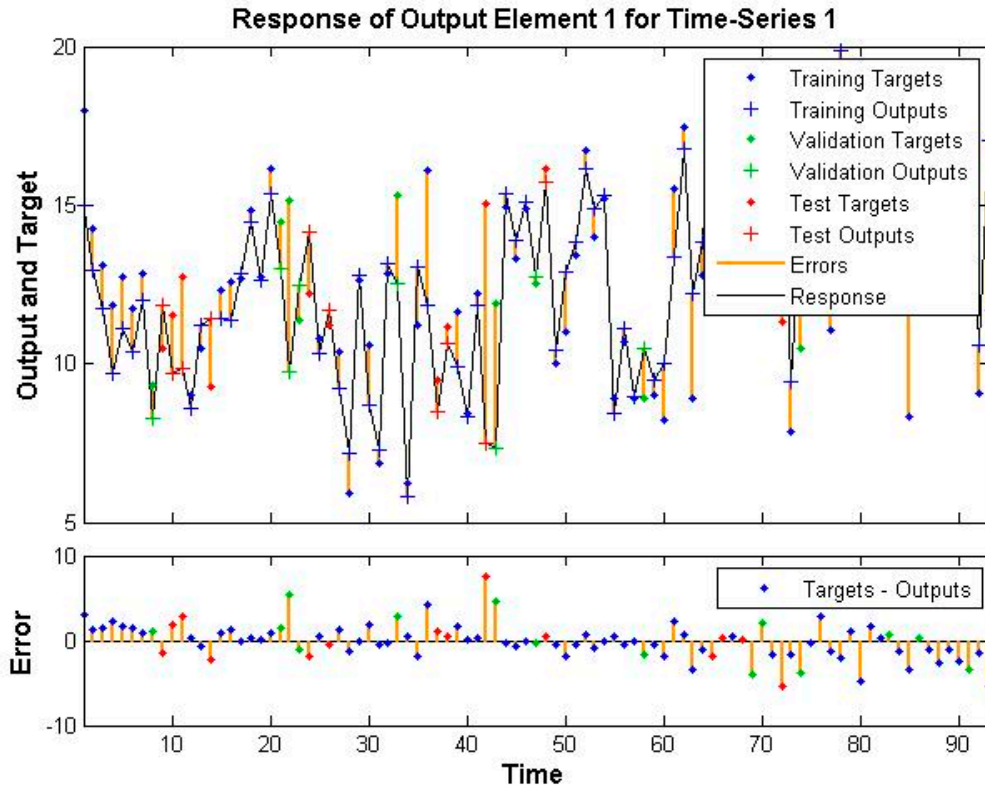

Figure S15. Time series of neural network training N<sub>2</sub> run 2 PM<sub>2.5</sub>.

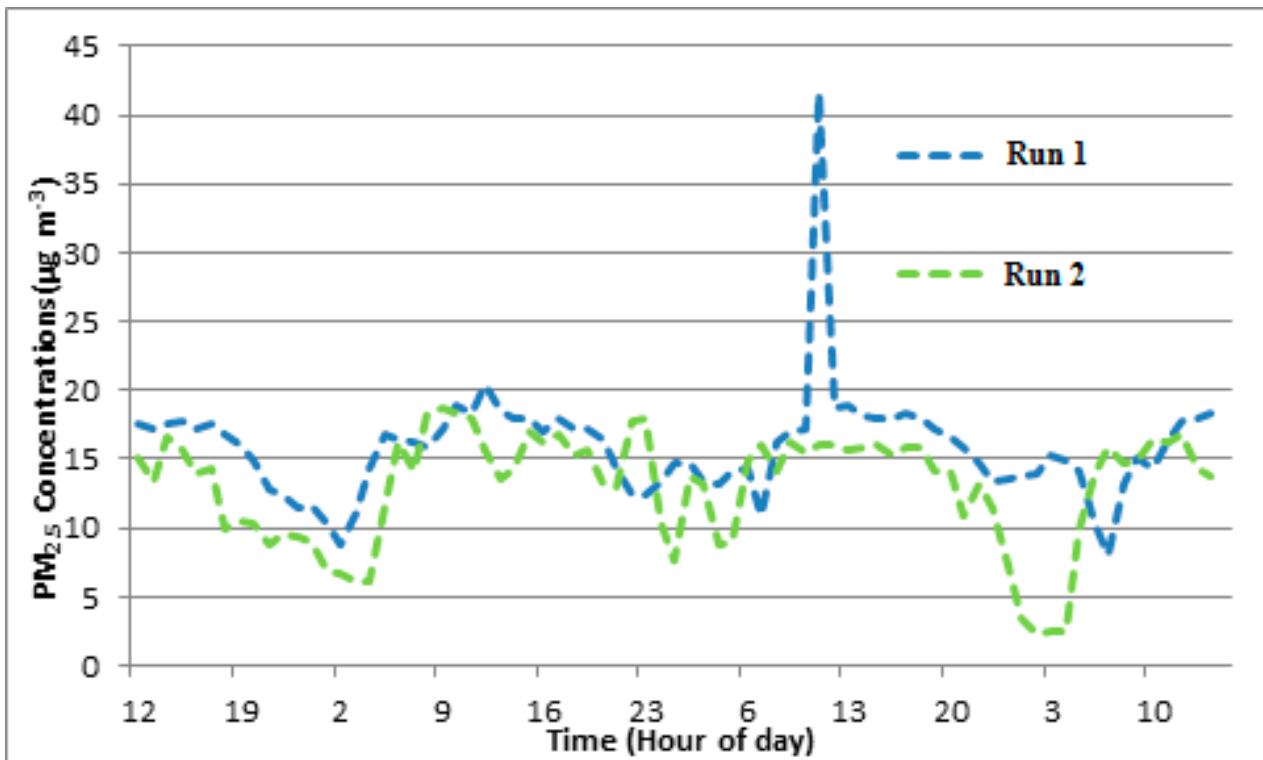

Figure S16. PM<sub>2.5</sub> outdoor concentrations N<sub>2</sub> run 1 and run 2.



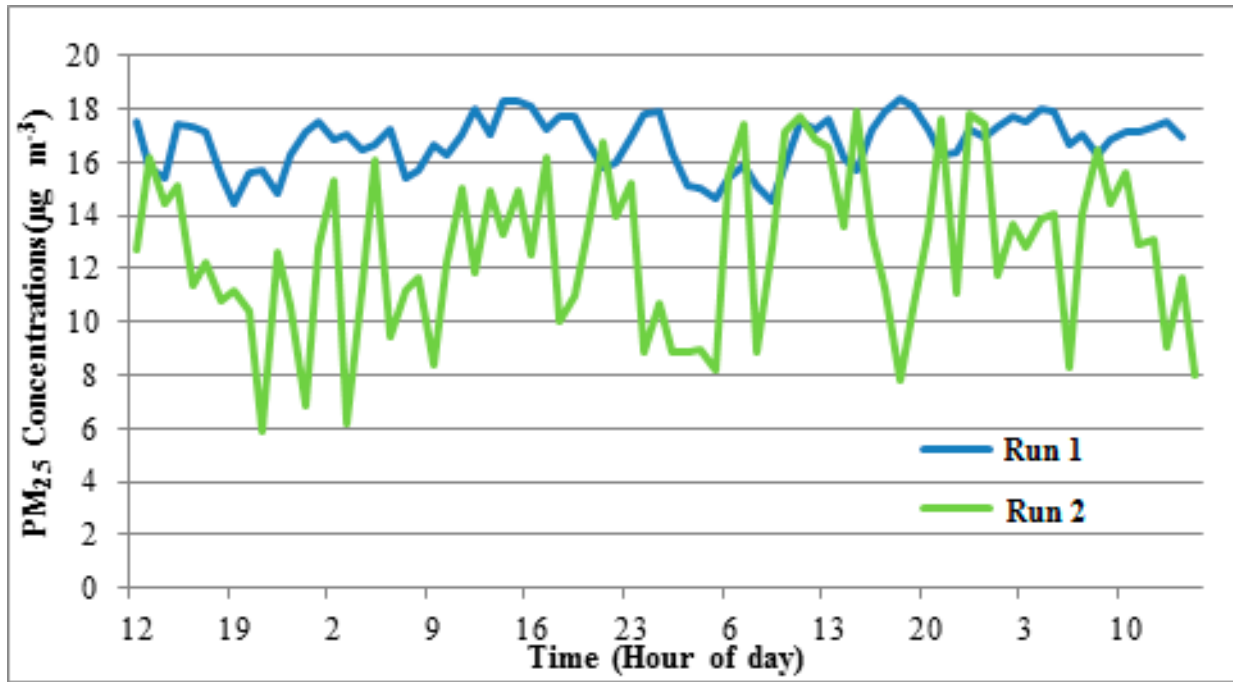

**Figure S17.** PM<sub>2.5</sub> indoor concentrations N<sub>t</sub>2 run 1 and run 2.

© 2015 by the authors; licensee MDPI, Basel, Switzerland. This article is an open access article distributed under the terms and conditions of the Creative Commons Attribution license (<http://creativecommons.org/licenses/by/4.0/>).
